# Supplementary material
Source: PubMed Central journal article supplement (PMC3940160)
Supplement: NIHMS539904-supplement-supplement_1.pdf [file NIHMS539904-supplement-supplement_1.pdf]

## **Supplemental Material**

**Targeting GGTase-I activates RHOA, increases macrophage reverse  
cholesterol transport, and reduces atherosclerosis in mice**

**Omar M. Khan,<sup>1</sup> Murali K. Akula,<sup>1</sup> Kristina Skålen,<sup>2</sup> Christin Karlsson,<sup>1</sup> Marcus  
Ståhlman,<sup>2</sup> Stephen G. Young,<sup>3</sup> Jan Borén,<sup>2</sup> and Martin O. Bergo<sup>1</sup>**

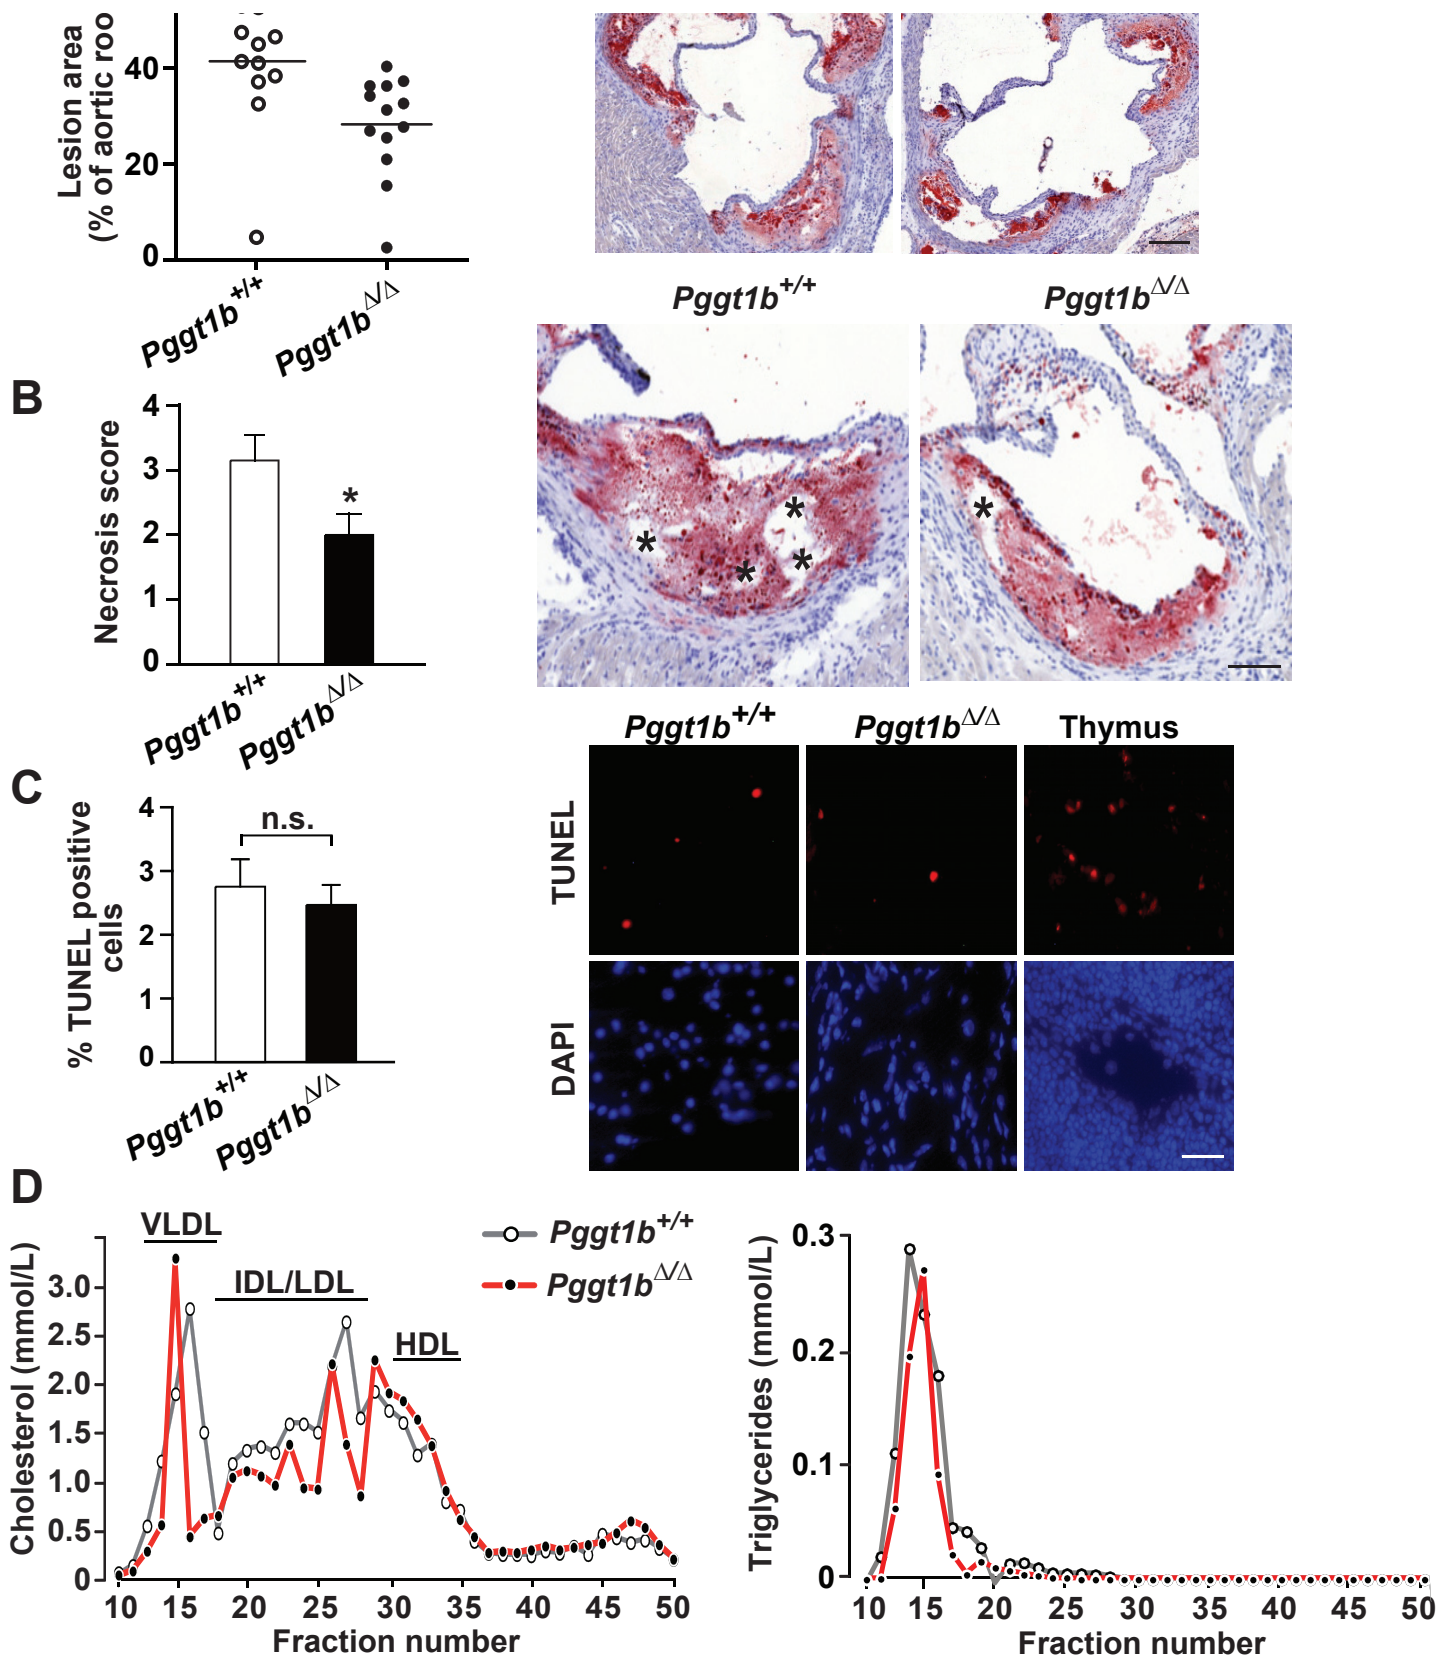

**Supplementary Figure 1** (A) Quantification of Oil Red O staining of lipid lesions in aortic root sections expressed as percent of total aortic root area. Right panel, representative photographs of Oil Red O-stained aortic root sections. Scale bar, 50  $\mu$ m. The mice were fed a high-fat diet for 12 weeks. (B) Quantification of necrosis in aortic root sections. The mice were fed a high-fat diet for 24 weeks. Right panel, photographs of Oil Red O-stained aortic root lesions; areas of necrosis are indicated. Scale bar, 20  $\mu$ m (C) Quantification of TUNEL positive cells in aortic root lesions from mice shown in panel B. Right panel, representative immunofluorescence images. Thymus was used as a positive control. Scale bar,

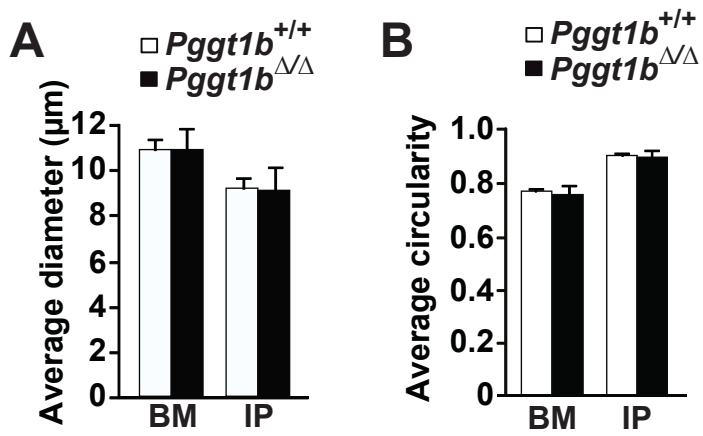

**Supplementary Figure 2** (A) Average diameter of BM and IP macrophages in suspension. (B) Average circularity of BM and IP macrophages in suspension. Values were obtained in a Vi-Cell XR cell counter (Beckman Coulter).

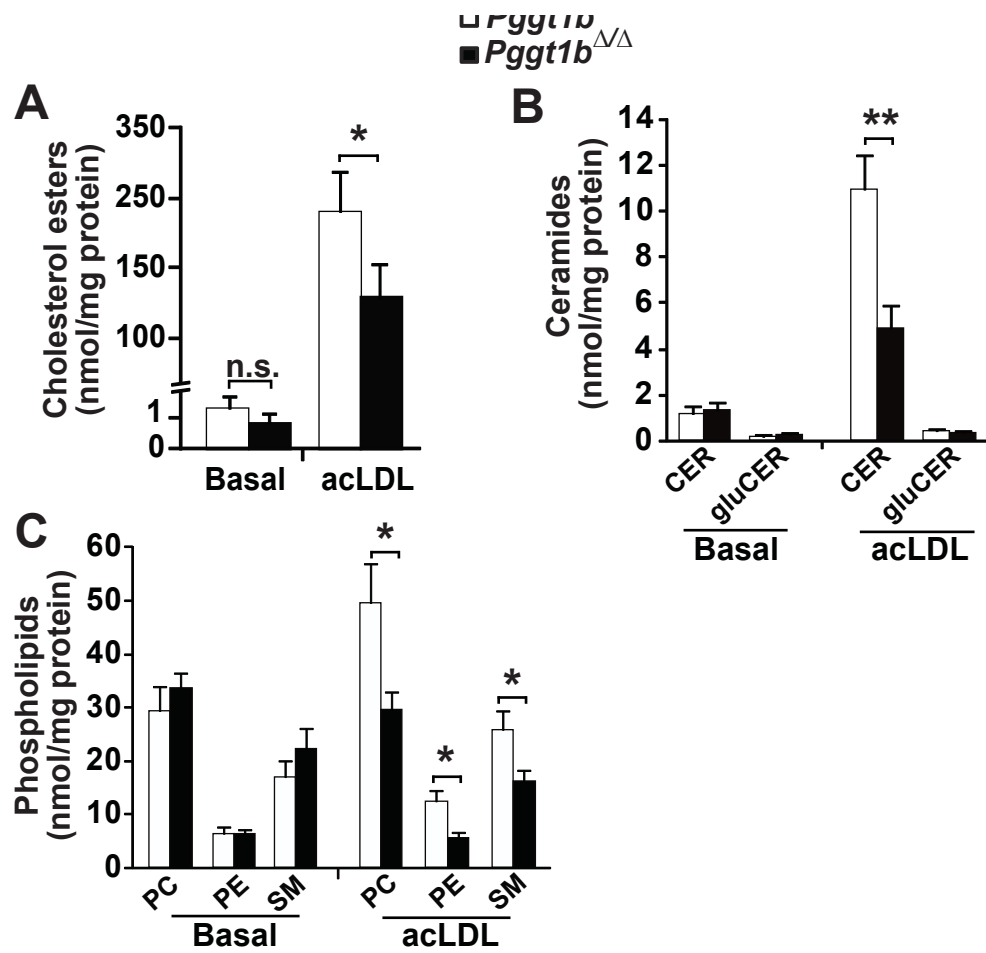

**Supplementary Figure 3** HPLC- and mass spectrometry-based lipidomic analyses of cholesterol esters (**A**); ceramide (CER) and glucosylceramide (gluCER) (**B**); phosphatidylcholine (PC), phosphatidylethanolamine (PE), and sphingomyelin (SM) (**C**) in BM macrophages before and after a 36-h incubation with acLDL (50 μg/ml). \*  $P < 0.05$  and \*\*  $P < 0.01$ .

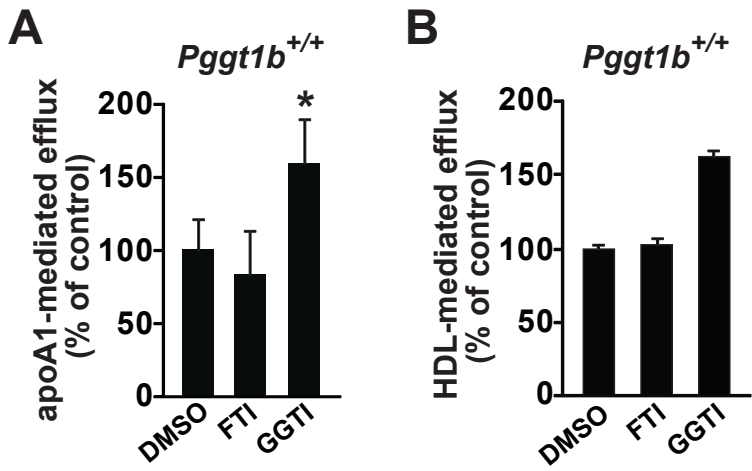

**Supplementary Figure 4 (A)** ApoA1-mediated cholesterol efflux in BM macrophages incubated with DMSO, FTI (10  $\mu$ M), and GGTI (10  $\mu$ M) ( $n = 3-4$ /treatment). **(B)** HDL-mediated cholesterol efflux in BM macrophages incubated with DMSO, FTI, and GGTI ( $n = 2$ /treatment).

# Supplementary Figure 5

**A**

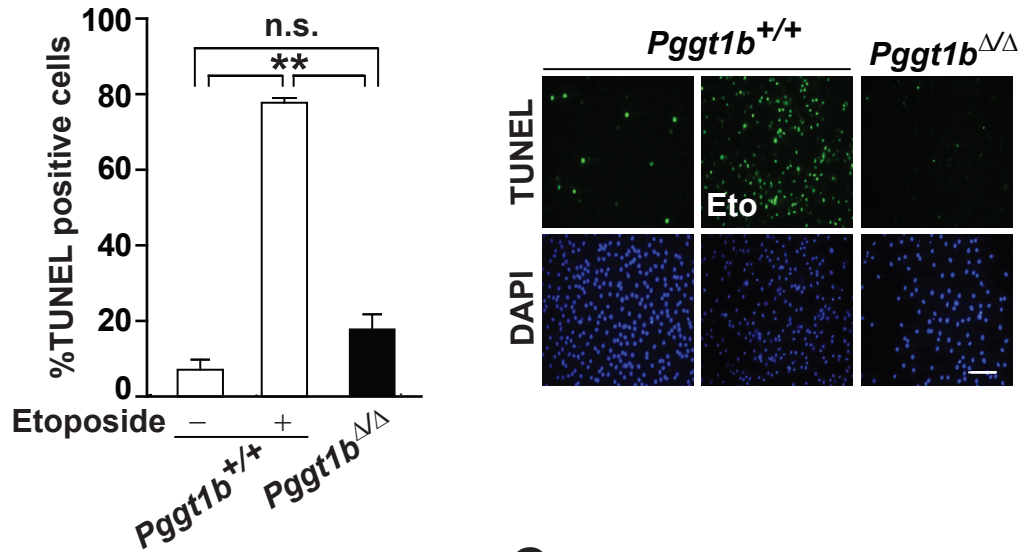

**B**

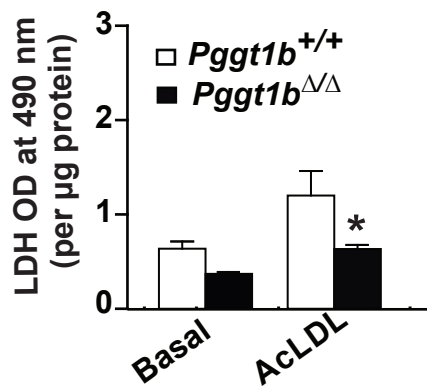

**C**

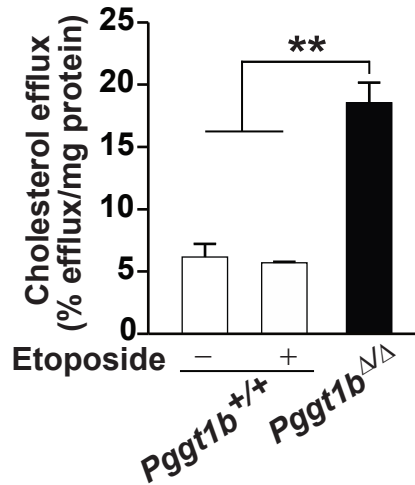

**Supplementary Figure 5 (A)** TUNEL staining of BM macrophages incubated for 24 h with 50 μg acLDL. Etoposide (25 μM) was used as a positive control. Right panel, representative immunofluorescence images. Scale bar, 10 μm. **(B)** Levels of lactate dehydrogenase (LDH; cytotoxicity assay) in cell culture media of BM macrophages from the efflux phase of the cholesterol efflux assay ( $n = 3/\text{genotype}$ ). **(C)** Basal cholesterol efflux of BM macrophages incubated with etoposide (25 μM) or DMSO during the equilibration and efflux phases of the cholesterol efflux assay ( $n = 3$  *Pggt1b*<sup>ΔΔ</sup> and 4 *Pggt1b*<sup>+/+</sup> cell lines).

# Supplementary Figure 6

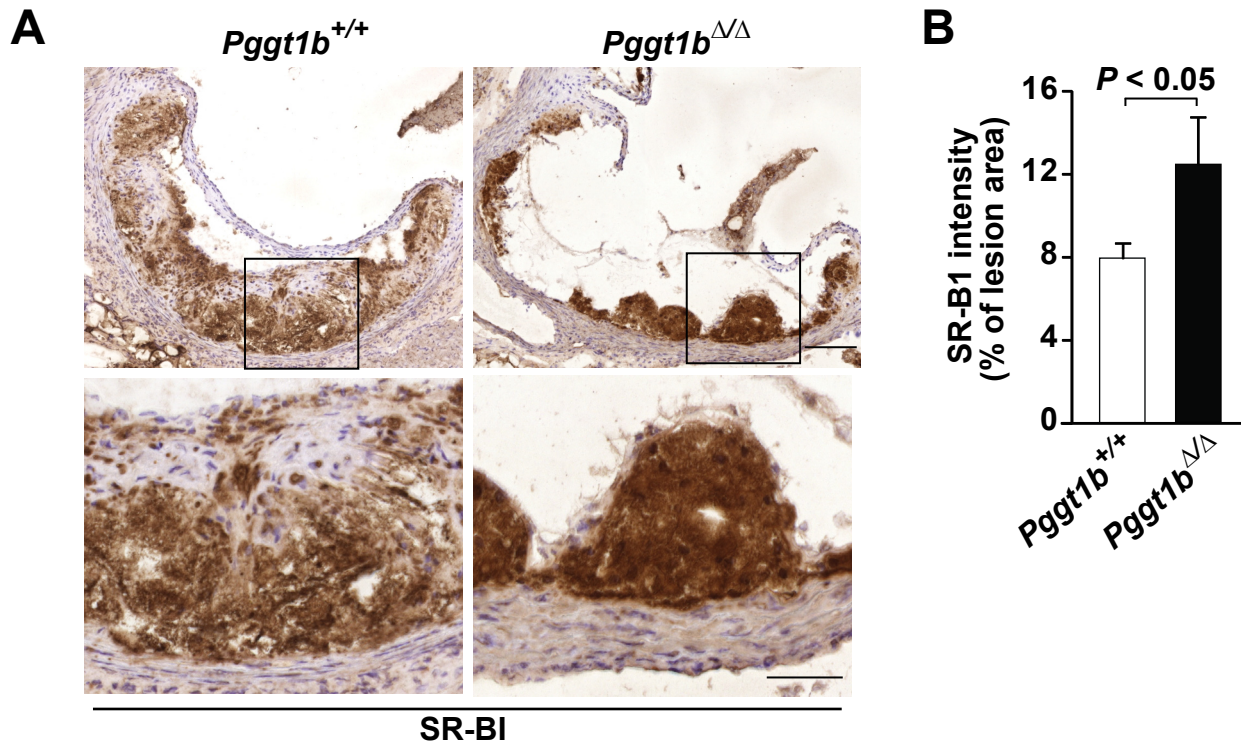

**Supplementary Figure 6 (A)** Immunohistochemical staining of SR-B1 in aortic root sections of mice fed a high-fat diet for 12 weeks. Scale bar, 10  $\mu$ m **(B)** Quantification of SR-B1 staining in aortic root lesions ( $n = 10$ /genotype).

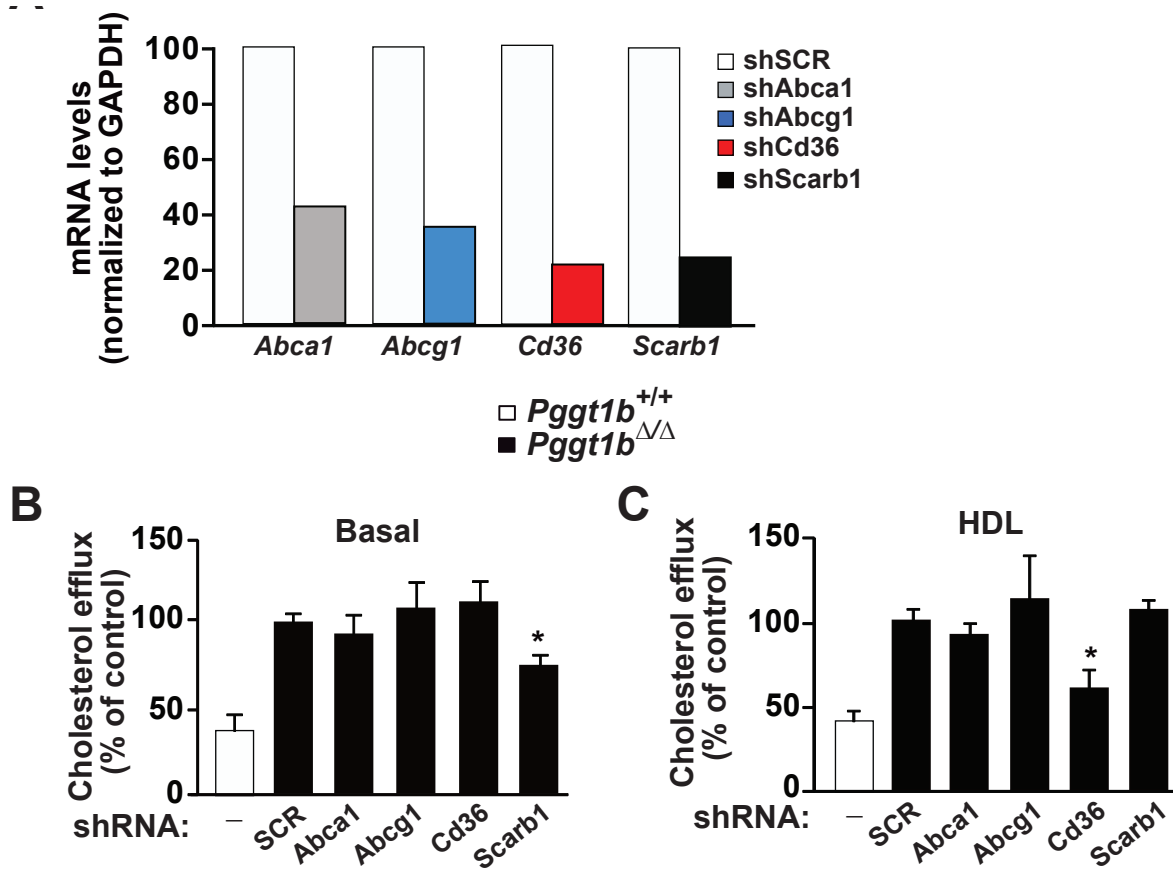

**Supplementary Figure 7** (A) Taqman analyses showing gene expression in BM macrophages incubated with lentiviruses expressing shRNAs for *Abca1*, *Abcg1*, *Cd36*, and *Scarb1*, or containing a scrambled (SCR) sequence ( $n = 2/\text{treatment}$ ). (B, C) Basal (B) and HDL-mediated (C) cholesterol efflux in BM macrophages incubated with lentiviruses described in A ( $n = 6-9/\text{treatment}$ ). \*  $P < 0.05$ .



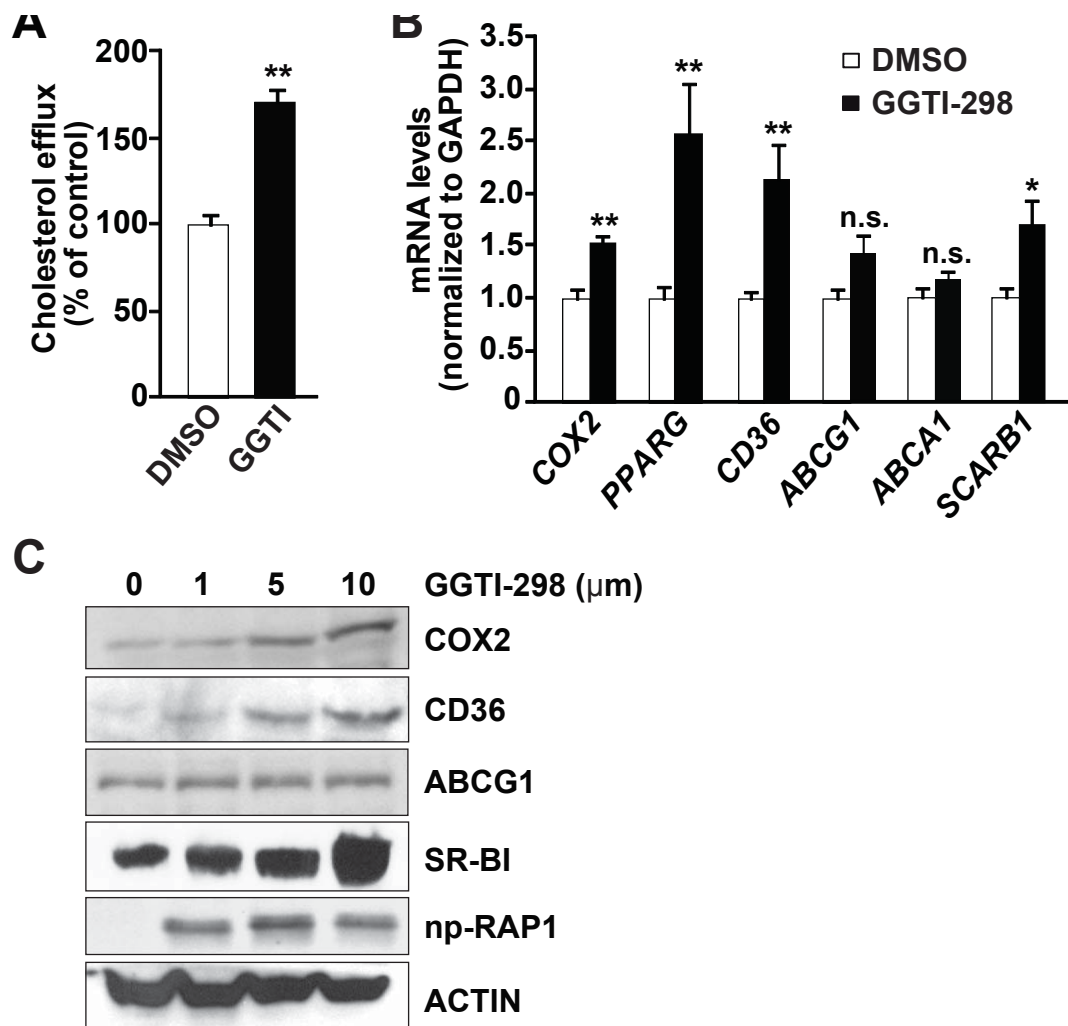

**Supplementary Figure 8** (A) Basal cholesterol efflux in THP-1 human macrophages incubated with DMSO or GGTI (10  $\mu$ M) for 48 h. Values are the mean of two independent experiments performed in triplicate. (B) TaqMan analysis showing gene expression in THP-1 macrophages incubated with DMSO or GGTI (10  $\mu$ M) for 48 h ( $n = 4$ /treatment). (C) Western blots of lysates from THP-1 macrophages incubated with DMSO or GGTI for 48 h. The experiment was repeated three times with similar results. \*  $P < 0.05$  and \*\*  $P < 0.01$ .

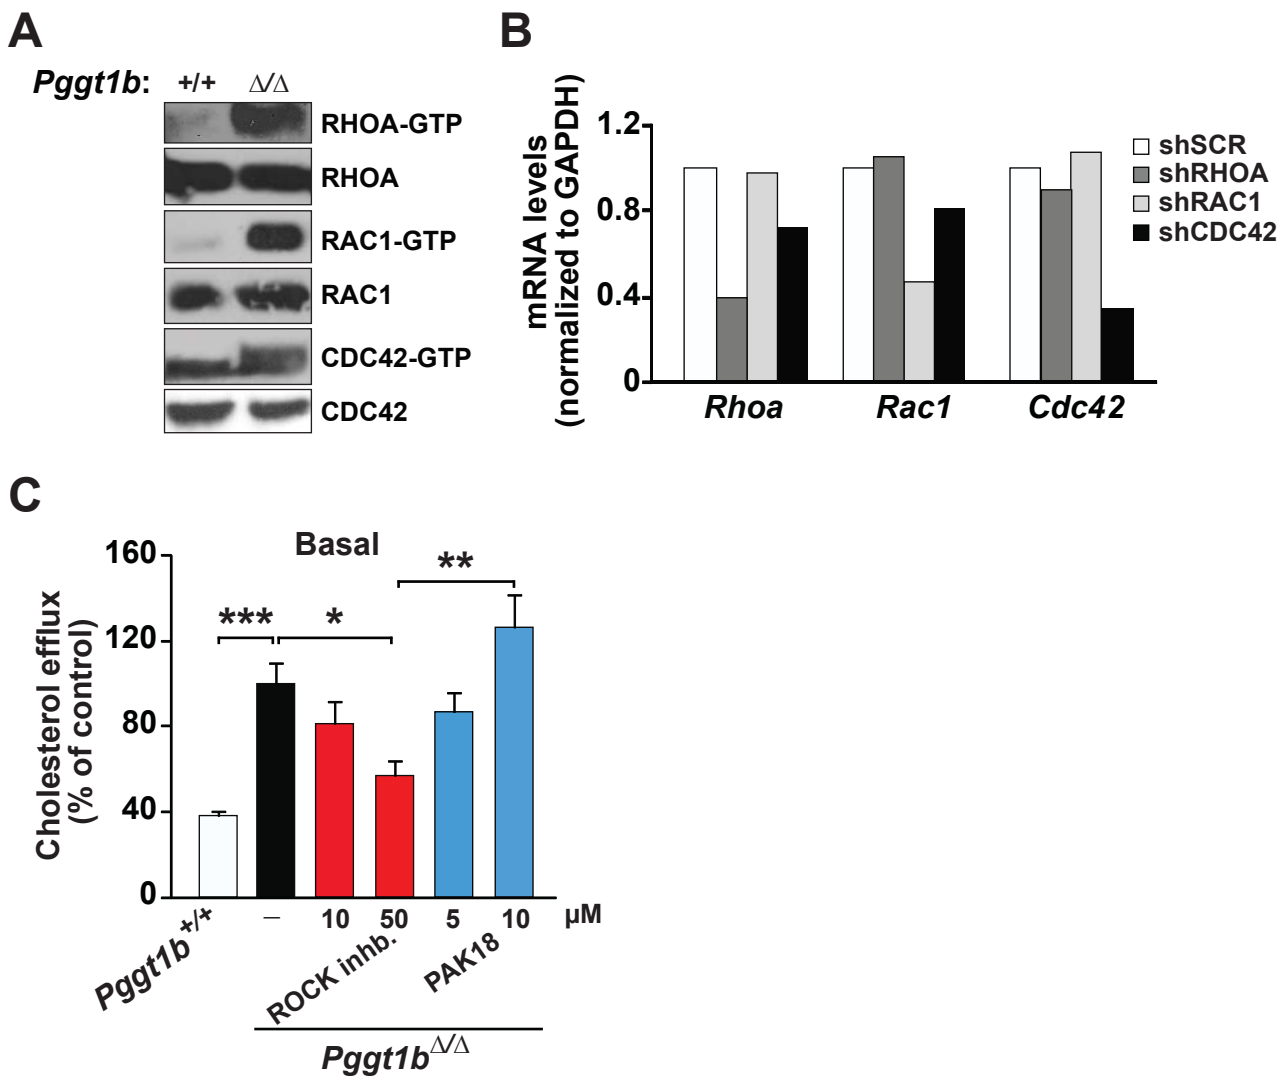

**Supplementary Figure 9 (A)** Western blots showing levels of GTP-bound and total RHOA, RAC1, and CDC42 in lysates of BM macrophages. **(B)** Taqman analyses showing gene expression in *Pggt1b* <sup>$\Delta/\Delta$</sup>  BM macrophages incubated with lentiviruses expressing shRNAs targeting RHOA, RAC1, and CDC42, or containing a scrambled (SCR) sequence ( $n = 3/\text{treatment}$ ). **(C)** Basal cholesterol efflux in BM macrophages incubated with DMSO, ROCK inhibitor, and PAK kinase inhibitor ( $n = 6\text{--}8/\text{genotype}$ ). \*  $P < 0.05$ , \*\*  $P < 0.01$ , and \*\*\*  $P < 0.001$ .
